# Supplementary material
Source: publisher site journal article supplement (https://www.dovepress.com/article/supplementary_file/586849/586849_Supplementary%20Tables.docx)
Supplement: Supplementary file 1 [file 586849_Supplementary%20Tables.docx]

Supplement Table 1. Diagnostic criteria for severity classification of COVID-19

| **Classification** | **Diagnostic Criteria** |
| --- | --- |
| Mild | Mainly presents with upper respiratory tract infection manifestations. |
| Moderate | Persistent high fever > 3 days and/or cough, dyspnea, etc.; respiratory rate < 30 breaths per minute, oxygen saturation > 93% at rest while breathing ambient air; characteristic COVID-19 pneumonia manifestations observed on imaging. |
| Severe | Meets any of the following criteria, which cannot be explained by other causes except COVID-19:  1. Dyspnea accompanied by a respiratory rate ≥ 30 breaths per minute;  2. Oxygen saturation ≤ 93% at rest while breathing ambient air;  3. PaO₂/ FiO₂ ≤ 300 mmHg (1 mmHg = 0.133 kPa);  4. Progressive deterioration of clinical symptoms, with obvious progression of lesions > 50% within 24–48 hours on pulmonary imaging. |
| Critical | Meets any of the following conditions:  1. Respiratory failure necessitating invasive or noninvasive mechanical ventilation;  2. Circulatory shock;  3. Complicated with multiorgan dysfunction requiring ICU monitoring and treatment. |

COVID-19: coronavirus disease 2019; PaO₂: arterial partial pressure of oxygen; FiO₂: fraction of inspired oxygen; ICU: intensive care unit.

Supplementary Table 2. Univariable and multivariable logistic regression of risk factor in COVID-19 patients with T2DM

| **Characteristics** | **Univariate analysis** | |  | **Multivariate analysis** | |
| --- | --- | --- | --- | --- | --- |
| **OR (95%CI)** | ***P-*Value** |  | **OR (95%CI)** | ***P-*Value** |
| Age | 1.03(1.02-1.04) | <.001 |  | 1.03(1.01-1.04) | .006 |
| Sex |  |  |  |  |  |
| Female | Reference |  |  | Reference |  |
| Male | 1.65 (1.16-2.35) | .005 |  | 1.67(1.06-2.67) | .029 |
| BMI | 0.96(0.91-1.01) | .142 |  |  |  |
| Smoking history |  |  |  |  |  |
| No | Reference |  |  |  |  |
| Yes | 1.21(0.82-1.77) | .342 |  |  |  |
| **Medical History** |  |  |  |  |  |
| Hypertension |  |  |  |  |  |
| No | Reference |  |  |  |  |
| Yes | 1.17(0.83-1.65) | .366 |  |  |  |
| Cardiovascular disease |  |  |  |  |  |
| No | Reference |  |  |  |  |
| Yes | 0.98(0.69-1.39) | .913 |  |  |  |
| Cerebrovascular disease |  |  |  |  |  |
| No | Reference |  |  | Reference |  |
| Yes | 1.94(1.39-2.71) | <.001 |  | 1.56(1.00-2.42) | .049 |
| Pulmonary disease |  |  |  |  |  |
| No | Reference |  |  |  |  |
| Yes | 1.40(0.81-2.44) | .234 |  |  |  |
| Chronic kidney disease |  |  |  |  |  |
| No | Reference |  |  |  |  |
| Yes | 0.94(0.61-1.43) | .761 |  |  |  |
| Liver disease |  |  |  |  |  |
| No | Reference |  |  |  |  |
| Yes | 0.37(0.12-1.11) | .076 |  |  |  |
| Rheumatoid disease |  |  |  |  |  |
| No | Reference |  |  |  |  |
| Yes | 1.43(0.67-3.06) | .353 |  |  |  |
| Malignancy |  |  |  |  |  |
| No | Reference |  |  |  |  |
| Yes | 1.35(0.83-2.19) | .225 |  |  |  |
| **Blood pressure on admission** |  |  |  |  |  |
| Systolic blood pressure | 1.00(0.99-1.01) | .691 |  |  |  |
| Diastolic blood pressure | 0.98(0.97-0.99) | .002 |  | 0.99(0.97-1.00) | .126 |
| **Diabetes Control** |  |  |  |  |  |
| Fasting blood glucose | 1.07(1.03-1.12) | .001 |  | 1.08(1.03-1.13) | .001 |
| Glycosylated hemoglobin | 1.02(0.93-1.11) | .726 |  |  |  |

Note: Data were as median (IQR). Abbreviations: BMI: body mass index.

Supplementary Table 3. Clinical outcome of patients in the severe group based on blood glucose control

| **Outcomes** | **Severe**  **N=133** | |  |  | **Non-severe**  **N=283** | |  |
| --- | --- | --- | --- | --- | --- | --- | --- |
|  | **With glucocorticoids**  **N=92** | **Without glucocorticoids**  **N=41** | ***P*-Value** |  | **With glucocorticoids**  **N=77** | **Without glucocorticoids**  **N=206** | ***P*-Value** |
| Long COVID-19 syndrome, n (%) | 6 (6.5) | 2 (4.9) | .713 |  | 8 (10.4) | 7 (3.4) | .019 |
| Interstitial pneumonia, n (%) | 5 (5.4) | 0 (0) | .128 |  | 3 (3.9) | 2 (1.0) | .096 |
